# Supplementary material for: Experience of being a bystander to violence in Wales: a cross-sectional study exploring public bystander experience and confidence and skills to intervene
Source: Research Square preprint supplement (doi:10.21203/rs.3.rs-8020079/v1), 2025-12-03
Supplement: Supplementary file 1 [file 7ac582a70d62e5b119a0fa8c.docx]

Table A1. Survey questions used

| **Outcome** | **Question *(response option)*** | **Qualifying response** |
| --- | --- | --- |
| **Exposure to…** | **In the last 12 months, which of the following forms of violence have you been a bystander to …?** *select all that apply*  *(Other [please specify]; I have not been a bystander to any forms of violence in the last 12 months; Prefer not to say)* | |
| **Sexual harassment towards females** | Sexual harassment (including catcalling) towards women and girls |  |
| **Sexual violence towards females** | Sexual violence (including unwanted touching) towards women and girls |
| **Domestic abuse** | Domestic abuse (e.g. between intimate partners) |
| **Verbal aggression between children and young people** | Verbal aggression between children and young people |
| **Physical violence between children and young people** | Physical violence between children and young people |
| **Physical punishment of children by an adult** | Physical punishment of children by an adult (e.g. smacking) |
| **Abuse of older people** | Abuse of older people |
| **Bystander to any violence type** | Selected any of the above option or ‘Other’ |
| **Confidence and skills for…** | **If you witnessed the following types of violence, do you feel you have the confidence and/or the skills to do something about it ...?** *(Yes, I have the confidence and the skills; I have the confidence but not the skills; I have the skills but not the confidence; No, I have neither the confidence nor the skills; Prefer not to say)* |  |
| **Sexual harassment towards females (16+ years)** | Sexual harassment towards females 16+ years (e.g. someone shouting comments of a sexual nature) | Neither confidence nor skills;  skills not confidence;  confidence not skills;  confidence and skills |
| **Sexual violence towards females (16+ years)** | Sexual violence towards females 16+ years (e.g. unwanted touching) |
| **Domestic abuse** | Domestic abuse (e.g. between intimate partners) This includes physical, emotional, and financial |
| **Verbal aggression between children and young people** | Verbal aggression between children and young people |
| **Physical violence between children and young people** | Physical violence between children and young people |
| **Physical punishment of children by an adult** | Physical punishment of children by an adult (e.g. smacking) |
| **Abuse of older people** | Abuse of older people  This includes physical, emotional, and financial abuse |
| **Willingness to undertake training** | If you were offered face-to-face training on developing skills and confidence on how to respond if you are a bystander to violence, how likely would you be to attend this? *(Very likely; Likely; Unlikely; Very unlikely; Prefer not to say)* | Very likely, Likely |

Table A2. Comparison of sample with Welsh national demographics

|  | **Analytical sample** | **National population*** |
| --- | --- | --- |
| **Sex** |  |  |
| Female | 67% | 51% |
| Male | 33% | 49% |
| **Age group (years)** |  |  |
| 16-29 | 19% | 21% |
| 30-49 | 30% | 29% |
| 50-69 | 35% | 31% |
| 70+ | 16% | 19% |
| **Ethnicity**^ |  |  |
| White | 95% | 95% |
| Other than White | 5% | 5% |
| **Deprivation quintile+** |  |  |
| (Most) 1 | 16% | 19% |
| 2 | 19% | 20% |
| 3 | 22% | 21% |
| 4 | 20% | 21% |
| (Least) 5 | 23% | 20% |

*Age 16+ Population equivalents from: ONS. Estimates of the population for the UK, England and Wales, Scotland and Northern Ireland. Population equivalents from: ONS. Estimates of the population for the UK, England and Wales, Scotland and Northern Ireland. Mid 2020. 2020. [www.ons.gov.uk/peoplepopulationandcommunity/populationandmigration/populationestimates/datasets/populationestimatesforukenglawww.ons.gov.uk/peoplepopulationandcommunity/populationandmigration/populationestimates/datasets/populationestimatesforukenglandandwalesscotlandandnorthernirelandandwalesscotlandandnorthernireland](http://www.ons.gov.uk/peoplepopulationandcommunity/populationandmigration/populationestimates/datasets/populationestimatesforukenglawww.ons.gov.uk/peoplepopulationandcommunity/populationandmigration/populationestimates/datasets/populationestimatesforukenglandandwalesscotlandandnorthernirelandandwalesscotlandandnorthernireland) ; +Welsh Index of Multiple Deprivation 2019 <https://www.gov.wales/welsh-index-multiple-deprivation-full-index-update-ranks-2019>, numbers may not add up to 100 due to rounding. ^National population ethnicity figures are for all ages as figures are not published for other than white ethnic groups aged 65+ due to small numbers; Stats Wales, <https://statswales.gov.wales/Catalogue/Equality-and-Diversity/Ethnicity>.
